# Supplementary material for: Thiol-/thioether-functionalized porous organic polymers for simultaneous removal of mercury(ii) ion and aromatic pollutants in water
Source: Royal Society of Chemistry journal article supplement (doi:10.1039/c9nj01111k), 2019-01-01
Supplement: c9nj01111k1.pdf [file c9nj01111k1.pdf]

## Supplementary materials

### **Thiol-/thioether-functionalized porous organic polymers for simultaneous removal of mercury(II) ion and aromatic pollutants in water**

Jincheng Cheng<sup>†</sup>, Yifan Li<sup>†</sup>, Li Li, Pengpeng Lu, Qiang Wang and Chiyang He\*

School of Chemistry and Chemical Engineering, Wuhan Textile University, Hubei  
Key Laboratory of Biomass Fibers and Eco-dyeing and Finishing, Wuhan 430073,  
China.

---

*E-mail:* chiyanghe@wtu.edu.cn.

<sup>†</sup>These authors contributed equally to this work.

**Table S1** Elemental analysis results of POP-SH and POP-SMe

|         | C (%) | H (%) | S (%) |
|---------|-------|-------|-------|
| POP-SH  | 58.18 | 3.74  | 5.94  |
| POP-SMe | 57.00 | 3.92  | 4.84  |

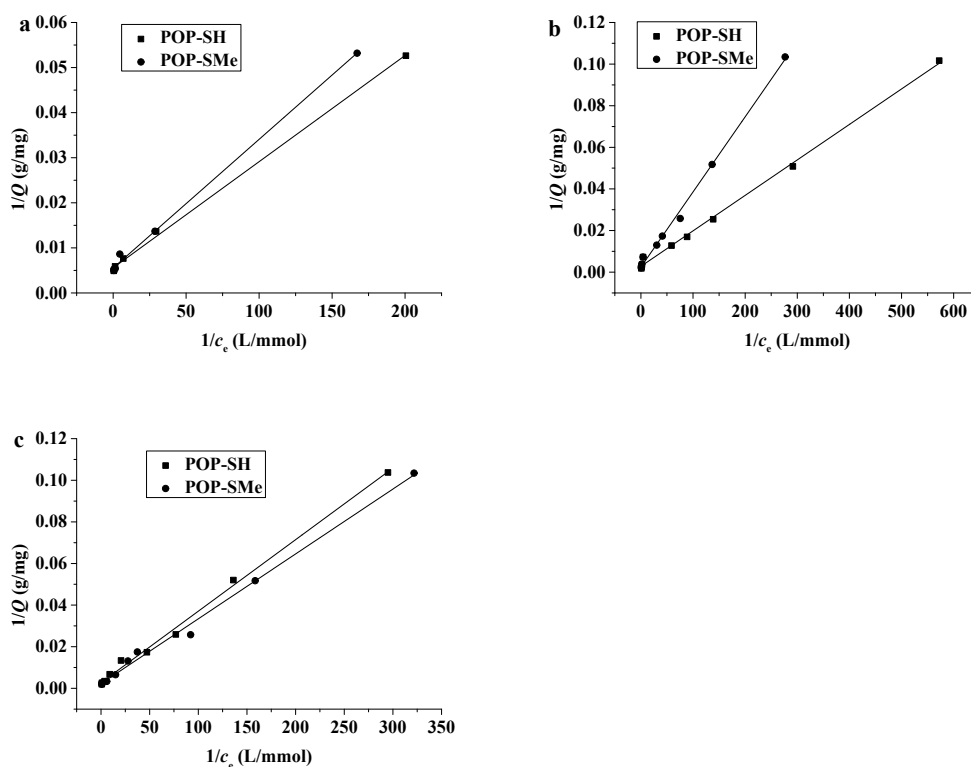

**Fig. S1** Langmuir adsorption isotherms of pollutants on new adsorbents: (a)  $Hg^{2+}$ , (b) toluene, and (c) m-xylene.

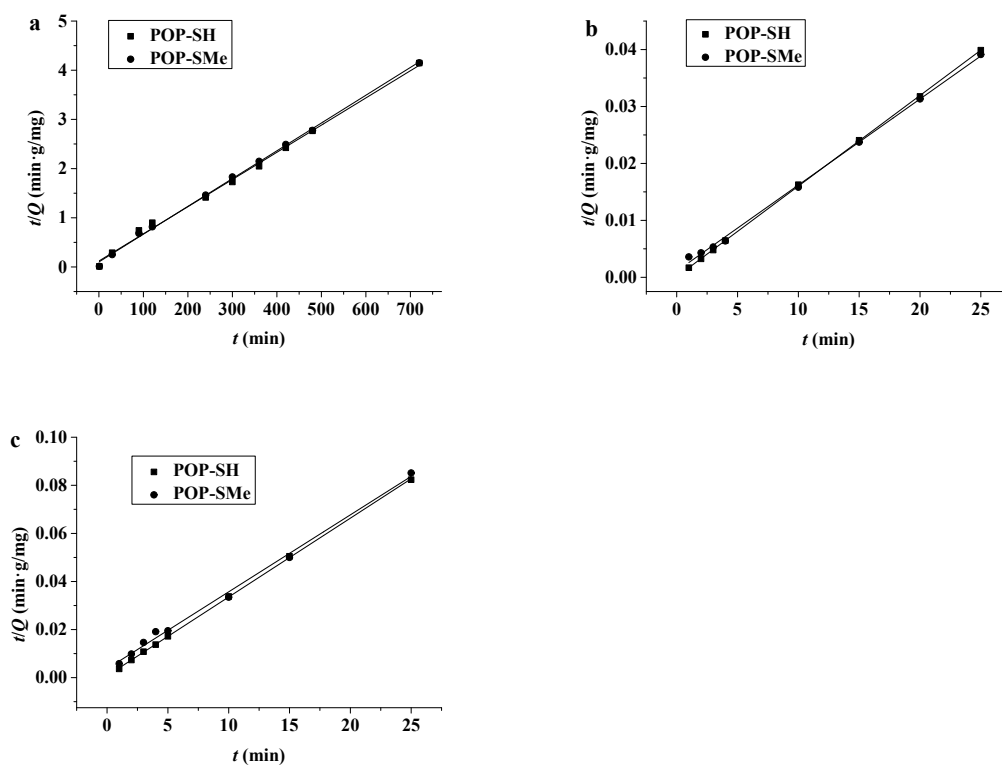

**Fig. S2** Pseudo-second-order adsorption model of pollutants on new adsorbents: (a)  $Hg^{2+}$ , (b) toluene, and (c) m-xylene.

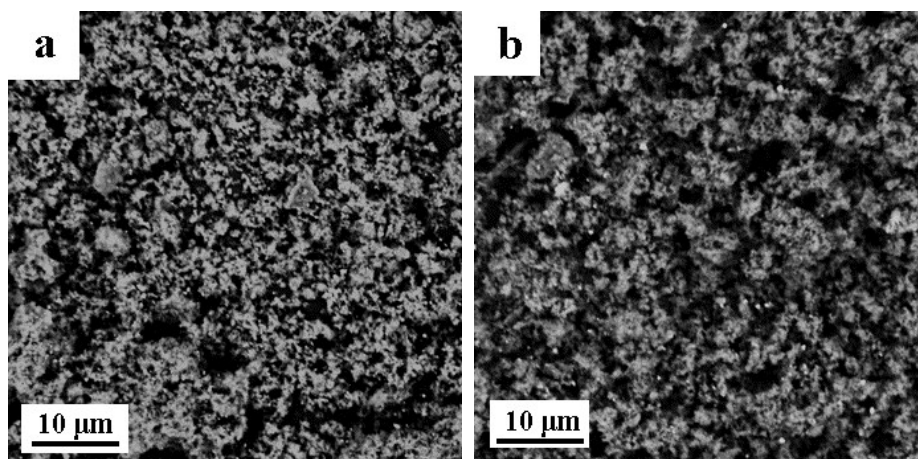

**Fig. S3** The SEM images of (a) POP-SH and (b) POP-SMe after three adsorption cycles.

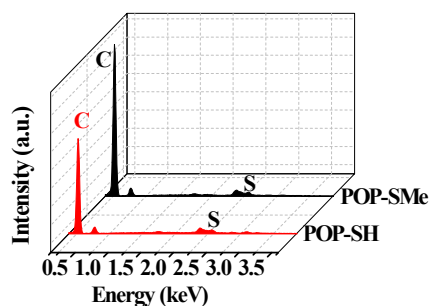

**Fig. S4** The EDX figures of POP-SH and POP-SMe after three adsorption cycles.

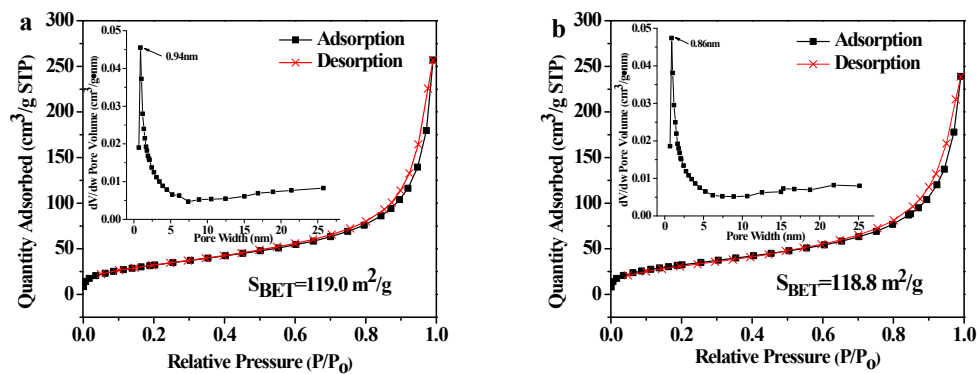

**Fig. S5** The nitrogen adsorption-desorption isotherms of (a) POP-SH and (b) POP-SMe after three adsorption cycles. The inserts are their pore distribution curves.
